# Supplementary material
Source: publisher figshare collection journal article supplement (https://acs.figshare.com/ndownloader/files/15548063)
Supplement: Supplementary file 1 [file 15548063]

## Supporting information

### **Reactive oxygen species generated by cold atmospheric plasmas in aqueous solution: successful electrochemical monitoring *in situ* under a high voltage system**

Fanny Girard-Sahun<sup>a,b</sup>, Vasilica Badets<sup>b</sup>, Pauline Lefrançois<sup>b</sup>, Neso Sojic<sup>b</sup>, Franck Clement<sup>\*a</sup> and Stéphane Arbault<sup>\*b</sup>

a UPPA, IPREM, CNRS UMR 5254, 2 avenue Président Angot, 64000 Pau, France

b Univ. Bordeaux, ISM, CNRS UMR 5255, INP Bordeaux, 33400 Talence, France

#### **Corresponding Authors:**

Dr Stéphane Arbault, email : [stephane.arbault@u-bordeaux.fr](mailto:stephane.arbault@u-bordeaux.fr) Tel.: +33540008939 ;

Dr Franck Clément, email: [franck.clement@univ-pau.fr](mailto:franck.clement@univ-pau.fr) Tel.: +33559 (407657) / (574190)

Supporting informations include the protocol for ultramicroelectrode fabrication (corresponding references at the end) as well as optical and SEM images of a modified UME (Figure S1). Then, a calibration by cyclic voltammetry in hydrogen peroxide + nitrite solutions of the UME used for measurements in Figure 4b is described in Figure S2.

**UME fabrication.** Modified UMEs were designed for these experiments: a thin Pt wire (25  $\mu\text{m}$  diameter; 99 % purity, Goodfellow) was sealed in a glass capillary for a final diameter close to 1 mm (Figure 1B). Each UME was polished with coarse- and fine-grade polishing papers before use and further modification. As already described<sup>1</sup>, the sensitivity of the working microelectrodes was enhanced by doing a potentiostatic electro-deposition of black platinum performed by reduction of hydrogen hexachloroplatinate (115 mM, diluted in 10 mM PBS, pH 7.4 with 0.76 mM of lead acetate)<sup>2</sup> at a potential of -60 mV vs Ag/AgCl/NaCl 3M. The electrodeposition was stopped when the total reduction charge reached  $0,07 \mu\text{C} \cdot \mu\text{m}^{-2}$ <sup>3</sup> (see Figure S1).

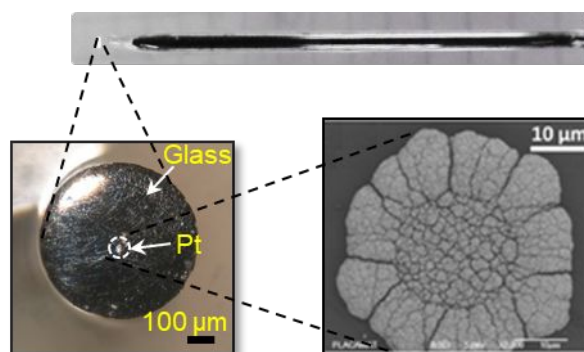

**Figure S1.** Multiscale view based on optical (top and down left) and SEM (down right) imaging of a platinized platinum ultramicroelectrode (Pt wire  $\varnothing$  25 $\mu\text{m}$ , total external diameter 1 mm) used as WE in the experiments.

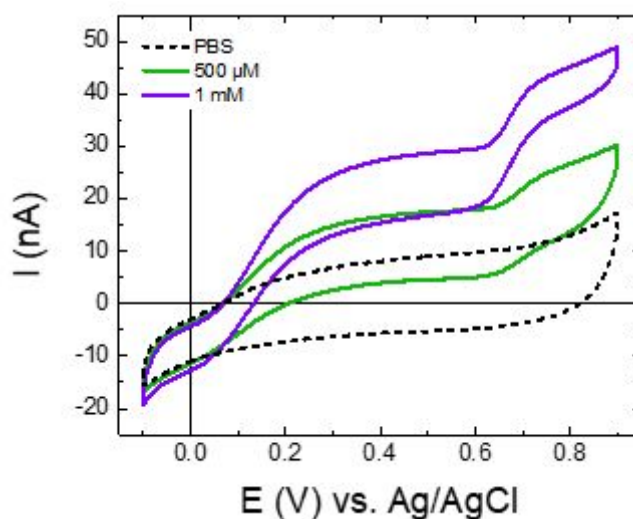

**Figure S2.** Cyclic voltammograms recorded with a platinized Pt UME (WE1) between -0.1 V and +0.9 V vs Ag/AgCl in solutions of combined  $\text{H}_2\text{O}_2 + \text{NO}_2^-$  prepared at the same concentrations in PBS (10 mM, pH 7.4).

## REFERENCES

- (1) Girard, F.; Peret, M.; Dumont, N.; Badets, V.; Blanc, S.; Gazeli, K.; Noël, C.; Belmonte, T.; Marlin, L.; Cambus, J.-P.; et al. Correlations between Gaseous and Liquid Phase Chemistries Induced by Cold Atmospheric Plasmas in a Physiological Buffer. *Phys. Chem. Chem. Phys.* **2018**, 20 (14), 9198–9210.

- (2) Ben-Amor, S.; Devin, A.; Rigoulet, M.; Sojic, N.; Arbault, S. Oxygen Plasma Treatment of Platinized Ultramicroelectrodes Increases Sensitivity for Hydrogen Peroxide Detection on Mitochondria. *Electroanalysis* **2013**, 25 (3), 656–663.
- (3) Ben-Amor, S. Capteurs Électrochimiques Pour La Caractérisation Du Métabolisme Oxydatif Mitochondrial. Thesis, Université Bordeaux 1, France, 2013.
